# 1 Spatial point locations explain a 2 range of social network positions in a 3 wild ungulate

4  
5 Gregory F Albery<sup>1,2</sup>, Alison Morris<sup>2</sup>, Sean Morris<sup>2</sup>, Josephine M Pemberton<sup>2</sup>, Tim H. Clutton-  
6 Brock<sup>2,3</sup>, Daniel H Nussey<sup>2</sup>, Josh A Firth<sup>4,5</sup>

- 7 1. Department of Biology, Georgetown University, Washington, DC  
8 2. Institute of Evolutionary Biology, University of Edinburgh, Edinburgh, UK  
9 3. Department of Zoology, University of Cambridge, Cambridge, UK  
10 4. Department of Zoology, University of Oxford, Oxford, UK  
11 5. Merton College, University of Oxford, Oxford, UK

12

## 13 Abstract

14 The structure of wild animal social systems governs many eco-evolutionary processes, and  
15 is determined by a complex combination of intrinsic and extrinsic drivers. Spatial structuring  
16 is a key determinant of sociality, but quantifying spatial components alongside multiple other  
17 drivers remains difficult due to data scarcity and analytical complexity. We used a 43-year  
18 dataset detailing a wild red deer population to investigate how individuals' spatial behaviours  
19 drive social network positioning, while simultaneously assessing other potential contributing  
20 factors. Using Integrated Nested Laplace Approximation (INLA) multi-matrix animal models,  
21 we demonstrate important roles of space sharing, two-dimensional point locations, and  
22 especially annually varying spatiotemporal locations, alongside reduced but detectable  
23 impacts of demography, genetics, and individual-level traits. Interestingly, spatial patterns  
24 and other drivers differed considerably among different social network metrics. These results  
25 indicate strong, multifaceted spatiotemporal structuring, emphasising the importance of  
26 considering multiple components of spatial behaviour when investigating the causes and  
27 consequences of sociality.

## 28 Introduction

29 Social behaviour is an integral component of an animal's phenotype, driving processes  
30 including disease transmission, mating, learning, and selection (Croft *et al.* 2008; Krause *et*  
31 *al.* 2015; Firth *et al.* 2018; Sah *et al.* 2018; Firth 2020). Due to its generality and flexibility,  
32 social network analysis has recently become an important method for studying wild animal  
33 social systems (Krause *et al.* 2015; Webber & Vander Wal 2019). Contemporary studies of  
34 animal behaviour often use social networks to derive individual-level traits (i.e. social  
35 network positions), under the notion that between-individual variation in network positioning  
36 is indicative of between-individual variation in social behaviour (Krause *et al.* 2015).  
37 However, social networks are also shaped by many extrinsic factors: demography  
38 determines population structure and the available individuals to interact with (Shizuka &  
39 Johnson 2019), while the environment governs resource distributions, movement corridors,  
40 and emergent patterns of space use, all of which will influence the architecture of the social  
41 system (Firth & Sheldon 2016; Webber & Vander Wal 2018; Farine & Sheldon 2019; He *et*  
42 *al.* 2019). As such, when assessing individual-level social network positions and associated  
43 eco-evolutionary consequences, it is important to consider the population's environmental  
44 context and individual space use as factors that may affect association patterns. Such  
45 analyses can provide insights into the extent to which intrinsic *versus* extrinsic processes  
46 contribute to social network positioning (Lusseau *et al.* 2006), and can reveal how social  
47 preferences and space use interact (Firth & Sheldon 2016; Spiegel *et al.* 2016; Webber &  
48 Vander Wal 2018), indicating underlying forces governing behavioural and social processes.

49 Several frameworks have been proposed to facilitate the untangling of spatial and social  
50 processes in wild animals (Jacoby & Freeman 2016; Silk *et al.* 2018, 2019; Webber &  
51 Vander Wal 2018; Mourier *et al.* 2019). To date, associated statistical methodology focusses  
52 on incorporating spatial activity into the node-and-edge structure of network data, including  
53 e.g. null network permutations (Firth & Sheldon 2016), spatially embedded networks  
54 (Daraganova *et al.* 2012), and nested super-networks composed of movement trajectories  
55 (Mourier *et al.* 2019). Many such analyses involve reducing movement patterns into some  
56 form of spatial network based on home range overlap or spatial proximity between dyads  
57 (Mourier *et al.* 2019). For example, statistical models named "animal models" can examine  
58 spatial variation by fitting such matrices as variance components, potentially alongside other  
59 dyadic similarity matrices, to quantify genetic and non-genetic contributions to individuals'  
60 phenotypes (Kruuk 2004; Stopher *et al.* 2012b; Regan *et al.* 2016; Thomson *et al.* 2018;  
61 Webber & Vander Wal 2018). However, movement paths are highly multivariate, and dyadic  
62 home range overlaps represent just one aspect of spatial behaviour (Mourier *et al.* 2019;

63 Pasquaretta *et al.* 2020). As such, controlling for structuring using space sharing alone  
64 potentially risks missing important variation.

65 On the one hand, there is now much evidence supporting the intuitive concept that spatial  
66 proximity and social activity are aligned: that is, individuals that share more space are more  
67 likely to associate or interact, for elk (Vander Wal *et al.* 2014), raccoons (Robert *et al.* 2012),  
68 foxes (Sanchez & Hudgens 2015), great tits (Firth & Sheldon 2016), and myriad other  
69 systems. However, while important, this concept is subtly distinct from fine-scale spatial  
70 assessment of heterogeneity in social behaviour – i.e., whether different areas of the  
71 landscape encourage different social network structures. For instance, if environmental  
72 gradients across a study system alter individuals' behaviour, then this will alter local social  
73 network structure, so that individuals will exhibit different social network traits depending on  
74 their locations in space – independent of their pairwise space sharing. Most notably,  
75 resource distributions are often extremely heterogeneous, altering habitat selection,  
76 aggregation in space, and therefore social network structure (Webber & Vander Wal 2018).  
77 Consequently, individuals living in high-resource areas may (for example) have many social  
78 partners. This phenomenon can have far-reaching consequences, for example by enhancing  
79 disease exposure in resource-supplemented populations (Becker *et al.* 2015). Notably, due  
80 partly to the analytical challenges, few studies of spatial-social structuring have examined  
81 the effect of point locations (i.e., where an animal is on a landscape) compared to space  
82 sharing (i.e., how much a pair of animals overlap in an unspecified space), and/or compared  
83 their influence to individual-level phenotypic traits.

84 Studies across ecological disciplines are increasingly using Integrated Nested Laplace  
85 Approximation (INLA) models to control for spatial autocorrelation in a multitude of contexts  
86 (Lindgren *et al.* 2011; Lindgren & Rue 2015; Zuur *et al.* 2017). This approach uses  
87 individuals' point locations to model 2-dimensional spatial patterns in the response variable,  
88 thereby controlling for and estimating spatiotemporal variation associated with fine-scale  
89 positioning within the landscape (Albery *et al.* 2019). Neither animal models nor INLA have  
90 yet been used to examine how spatial processes shape social network positions, despite  
91 their enormous potential for doing so. Further, although animal models can be fitted using  
92 INLA (Holand *et al.* 2013), there has been no exploration of how dyadic space sharing and  
93 individual point locations can be fitted simultaneously within animal models, how these  
94 factors compete with each other, and what insights this framework can provide.

95 As with spatial behaviour, sociality can be summarised using a range of different metrics  
96 (Krause *et al.* 2015; Sosa *et al.* 2020). Social network measures can represent individuals'  
97 own social connections, such as 'degree' (their number of social ties), or 'average strength'

98 (the mean strength of their associations); alternatively, more complex network metrics may  
99 represent individuals' positions within the wider network, including 'betweenness' (the extent  
100 to which they bridge different social groups), 'Eigenvector centrality' (the centrality of their  
101 associates), and 'clustering' (the propensity for their associates to be connected to one  
102 another). These diverse metrics can provide insights into different aspects of social  
103 behaviour, while arising from different spatial movement syndromes: for example, individuals  
104 that consistently inhabit densely populated locations may commonly reoccur with the same  
105 individuals and thus experience high average strength, while individuals that move around  
106 various locations or inhabit restricted movement corridors may connect otherwise  
107 disconnected social groups together, thereby exhibiting high betweenness centrality (Firth *et*  
108 *al.* 2017). Further, different metrics can also provide insights into various consequences of  
109 sociality: for instance, while spreading a highly contagious disease may depend heavily on  
110 an animal's degree (unique number of partners), their influence on the spread of a learned  
111 behaviour may depend more on local clustering (Firth 2020). Because few studies use  
112 multiple spatial behaviour metrics (as outlined above) and few include other potential drivers  
113 in the same models, it is unclear how spatial factors compare to other individual-level and  
114 demographic factors in shaping sociality, and whether different spatial behaviours are  
115 important for determining different social network metrics.

116 The Isle of Rum red deer (*Cervus elaphus*) study population is an unmanaged wild  
117 population with a fission-fusion social system (Clutton-Brock *et al.* 1982). They exhibit spatial  
118 autocorrelation in a number of important phenotypes: individuals with greater home range  
119 overlap have more similar behavioural and life history traits (Stopher *et al.* 2012b), and those  
120 in closer proximity have more similar parasite burdens (Albery *et al.* 2019); further, as with  
121 other matrilineal mammalian systems, closely related individuals frequently associate  
122 (Clutton-Brock *et al.* 1982) and live closer together (Stopher *et al.* 2012b). Individuals have  
123 highly repeatable home ranges (Stopher *et al.* 2012b) which decline in size over their  
124 lifetimes, predicting declining survival probability (Froy *et al.* 2018). As such, the deer  
125 comprise an ideal system for assessing spatial-social relationships in the wild.

126 To assess how individuals' spatial behaviours translate to social network positions, we  
127 constructed fine-scale social networks from 43 years of censuses describing social  
128 groupings across the study population. We derived 8 different individual-level network  
129 positioning measures of varying complexity which are often proposed to be important to  
130 different social processes (Krause *et al.* 2015; Sosa *et al.* 2020). Using multi-matrix animal  
131 models in INLA (Thomson *et al.* 2018), we examined whether spatial locations and home  
132 range overlap explained variation in network position metrics, alongside a range of  
133 individual-, temporal-, and population-level factors. Additionally, we investigated how various

134 spatiotemporal autocorrelation structures compared in determining social behaviour. We  
135 expected that a) locations on the landscape would determine a substantial proportion of  
136 social network positioning, comparable or greater than space sharing and other individual-  
137 level drivers; b) that this influence would be temporally varying; and c) that different social  
138 network metrics would exhibit different spatial patterns and vary in their relationship to the  
139 other drivers. We furthermore predicted that the spatial gradient in population density would  
140 have a strong effect on social network structure. This not only comprises a large-scale  
141 empirical examination of the factors shaping social network positions in this extensively  
142 monitored wild mammal, but also provides a methodological advancement in developing  
143 powerful, flexible new methods (INLA-based multi-matrix animal models) with broad potential  
144 for examining spatial-social processes in this and other systems.

## 145 **Methods**

### 146 **Study system and censusing**

147 This study was carried out on a long-term study population of red deer on the Isle of Rum,  
148 Scotland (57°N,6°20'W). We focussed on females aged 3+ years, as these individuals have  
149 the most complete associated census data. Individuals are monitored from birth, providing  
150 substantial life history and behavioural data, and >90% of calves are caught and tagged,  
151 with tissue samples taken (Clutton-Brock *et al.* 1982). The population thus has  
152 comprehensive genomic data, allowing high-powered quantitative genetic analyses: most  
153 individuals born since 1982 have been genotyped at >37,000 SNPs, distributed throughout  
154 the genome (e.g. Huisman, Kruuk, Ellis, Clutton-Brock, & Pemberton, 2016). Census data  
155 were collected for the years 1974-2017, totalling 423,070 census observations. Deer were  
156 censused by field workers five times a month, for eight months of the year, along one of two  
157 alternating routes (Clutton-Brock *et al.* 1982). Individuals' identities, locations (to the nearest  
158 100M), and group membership were recorded. Grouping events were estimated by  
159 seasoned field workers according to a variant of the "chain rule" (e.g. Castles *et al.*, 2014),  
160 where individuals grazing in a contiguous group within close proximity of each other (under  
161 ~10 metres) were deemed to be associating. Our dataset totalled 3356 annual observations  
162 among 532 grown females, with mean 112 groups observed per individual (Figure 1).

163 In this system, female reproduction imposes substantial costs for immunity and parasitism  
164 (Albery *et al.* 2020), and for subsequent fitness (Clutton-Brock, Albon, & Guinness, 1989;  
165 Froy, Walling, Pemberton, Clutton-Brock, & Kruuk, 2016). If a female reproduces, she  
166 produces 1 calf per year in the spring, generally beginning in May; the "deer year" begins on  
167 May 1 for this reason. Here, reproductive status was classified into the following four  
168 categories using behavioural observations: True Yeld (did not give birth); Summer Yeld (the

169 female's calf died in the summer, before 1<sup>st</sup> October); Winter Yeld (the female's calf died in  
170 the winter, after 1<sup>st</sup> October); and Milk (calf survived to 1<sup>st</sup> May the following calendar year).

## 171 [Generating spatial and social matrices](#)

172 All code is available online at [https://github.com/gfalbery/INLA\\_N\\_Out](https://github.com/gfalbery/INLA_N_Out). We constructed the  
173 HRO matrix using the R package AdeHabitatHR, following previous methodology (Stopher *et al.* 2012b;  
174 Regan *et al.* 2016; Froy *et al.* 2018). First, using a kernel density estimation  
175 method, we derived lifetime home ranges for each individual with more than five census  
176 observations. We used lifetime home ranges to fit one value per individual in the animal  
177 models; individual ranges (and range sizes) correlate strongly from year to year (Stopher *et al.* 2012b;  
178 Froy *et al.* 2018). We derived proportional home range overlap (HRO) of each  
179 dyad using Bhattacharya Affinity (following Stopher *et al.* 2012b), producing values between  
180 0-1 (i.e. no overlap to complete overlap).

181 To control for individuals' two-dimensional point locations we used a Stochastic Partial  
182 Differentiation Equation (SPDE) effect, in which distance between points is used to calculate  
183 spatial autocorrelation using Matern covariance (Lindgren *et al.* 2011). This random effect  
184 used individuals' annual centroids (mean easting and northing in a given year) or lifetime  
185 centroids (mean easting and northing across all observations) as point locations to  
186 approximate spatial variation in the response variable (Lindgren *et al.* 2011; Albery *et al.*  
187 2019). We used a genomic relatedness matrix ( $R_{GRM}$ ) using homozygosity at 37,000 Single  
188 Nucleotide Polymorphisms, scaled at the population level (Yang *et al.* 2011; for a population-  
189 specific summary, see Huisman *et al.* 2016). This matrix is well-correlated with pedigree-  
190 derived relatedness metrics (Huisman *et al.* 2016). Home range overlap was well-correlated  
191 with distance between lifetime centroids (i.e., closer individuals tended to share more range),  
192 and both were weakly but significantly correlated with genetic relatedness (Supplementary  
193 Figure 1).

194 We constructed annual social networks using "gambit of the group," where individuals in the  
195 same grouping event (as described above) were taken to be associating (Franks *et al.*  
196 2010). Dyadic associations were calculated using the 'simple ratio index' (Cairns &  
197 Schwager 1987) derived as a proportion of total sightings (grouping events) in which the  
198 focal individuals were seen together:  $Sightings_{A,B}/(Sightings_A+Sightings_B-Sightings_{A,B})$ , or  
199  $Intersect_{A,B}/Union_{A,B}$ . In this dyadic matrix, 0=never seen together and 1=never seen apart.  
200 We constructed a series of 43 annual networks constructed only from census records in  
201 each May-December period, from which we derived annual social network position  
202 measures as response variables (Figure 1-2). We elected to investigate this seasonal period



203 because it stretches from the spring calving period until the beginning of the mortality period,  
 204 simplifying network construction and avoiding complications arising from mortality events.

205

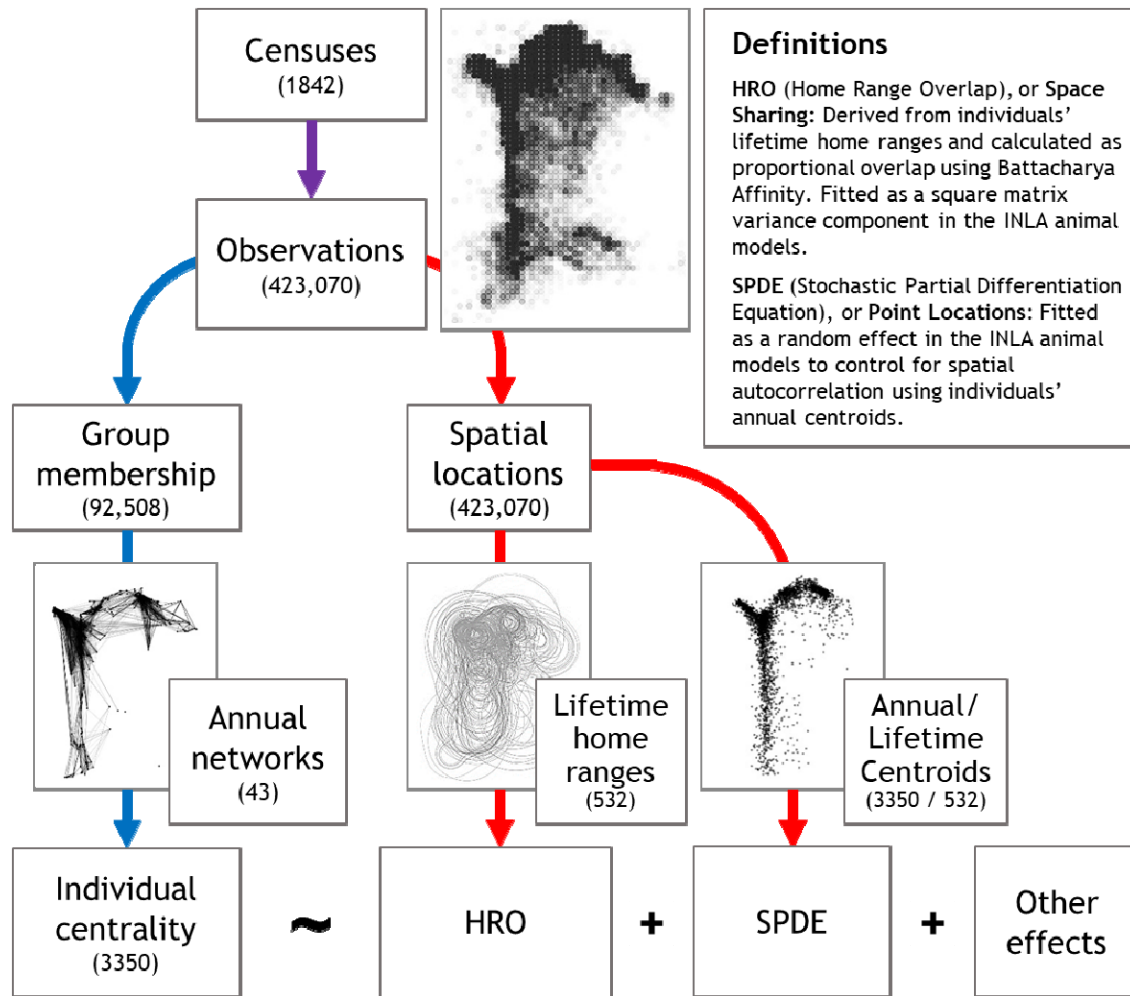

206

207

208 Figure 1: Data processing and analysis pipeline, demonstrating how behavioural census  
 209 data were collected, used to derive social and spatial behavioural traits, and fitted in INLA  
 210 animal model GLMMs. Numbers in brackets represent sample sizes, and only include  
 211 females aged 3+ years. Blue arrows represent social behaviour; red arrows represent spatial  
 212 behaviours. See methods for the fixed and random effects. The text box displays the  
 213 definitions for the different spatial effects.

214

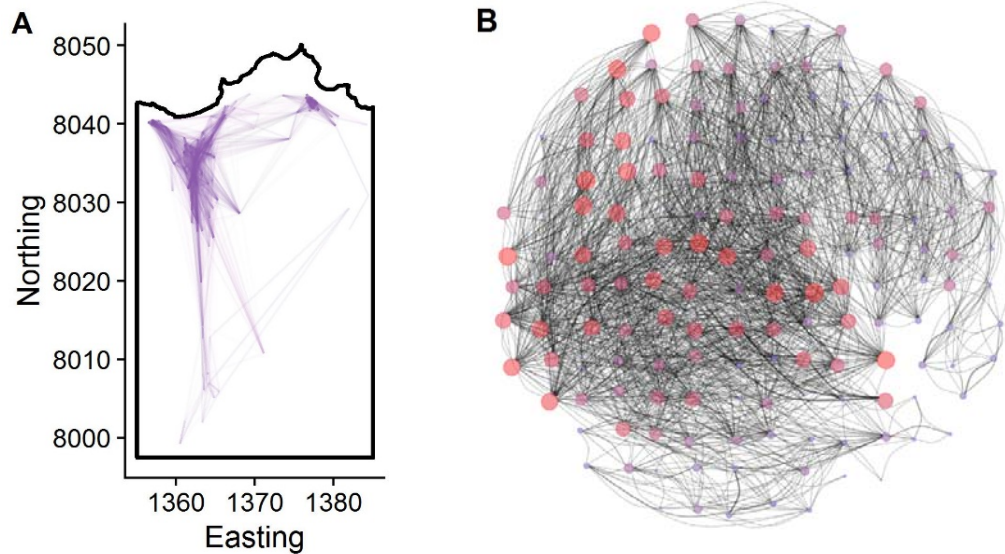

215

216 Figure 2: Spatial structuring of the 2016 social association network as a representative  
217 example. A: the spatial locations (centroids) of individual deer, connected by their social  
218 associations. Line opacity and width are weighted by connection strength. Ten axis units =  
219 1KM. B: the same social network expanded into an even, circular grid according to their  
220 nearest spatial positions in A). The points' (i.e. nodes') sizes and colours show individuals'  
221 strength centrality (large and red=high strength; small and blue=low strength). Thickness of  
222 the lines (i.e. edges) connecting them shows dyadic association strength between  
223 individuals.  
224

## 225 Statistical Analysis

226 We derived eight individual-level network metrics from the annual social networks for use as  
227 response variables in INLA Generalised Linear Mixed Models (GLMMs) with a Gaussian  
228 family specification. In increasing order of complexity, our measures included four direct  
229 metrics: 1) Group Size – the average number of individuals a deer associated with per  
230 sighting; 2) Degree – the number of unique individuals she was observed with; 3) Strength –  
231 sum of all their weighted social associations to others; 4) Mean Strength – the average  
232 association strength to each of the unique individuals she was observed with (equivalent to  
233 strength divided by degree). We also included four more complex “indirect” metrics: 5)  
234 Eigenvector centrality – akin to the sum of her unique associates’ degrees; 6) Weighted  
235 Eigenvector – akin to the sum of her associates’ strengths weighted by their association to  
236 her; 7) Betweenness – the number of shortest paths that pass through the focal individual to  
237 traverse the whole network; 8) Clustering (local) – the tendency for an individual’s contacts  
238 to be connected to one another, forming triads. The raw, untransformed correlations were  
239 assessed for all metrics (Supplementary Figure 2); when modelling them as response



240 variables, to approximate normality, all social metrics were square root-transformed apart  
241 from eigenvector centralities (which were left untransformed), group size (which was cube  
242 root-transformed), and betweenness (which was log-transformed). Each social network  
243 metric was fitted as a response variable in a separate model set (as outlined conceptually in  
244 Figure 1). We ensured that all models followed the same base structure. Random effects  
245 included individual identity and year (categorical), as well as the genetic relatedness matrix.  
246 Fixed effects included Age (continuous, in years), Reproductive Status (four categories: True  
247 Yeld; Summer Yeld; Winter Yeld; and Milk), and Number of observations (continuous, log-  
248 transformed), as well as year-level continuous factors including Year (continuous) and that  
249 year's study Population Size (log-transformed). All continuous response and explanatory  
250 variables were standardised to have a mean of zero and a standard deviation of 1.

251 To investigate the divergent effects of different spatial behaviours, we iteratively added  
252 different combinations of spatial random effects to the base model, in increasingly complex  
253 formulations. First, we added the HRO (space sharing) matrix. Next, we added an INLA  
254 Stochastic Partial Differentiation Equation (SPDE or point location) spatial effect based on  
255 lifetime centroids, to investigate whether point locations and space sharing behaved similarly  
256 when at the same timescale (i.e., across individual lifetimes). Next, to investigate whether  
257 finer temporal scales improved our inference of spatial effects, we altered the SPDE effect to  
258 use annual rather than lifetime centroids. Finally, we fitted the annual centroids in a  
259 spatiotemporal model structure, allowing entirely different (uncorrelated) spatial fields for the  
260 SPDE effect for each year. Only one of the SPDE random effects was fitted at once, and the  
261 best-fitting model was identified using changes in Deviance Information Criterion (DIC). A  
262 conservative change of  $10\Delta\text{DIC}$  was used to differentiate between competing models – i.e.,  
263 any variable that decreased DIC by more than 10 was deemed significant.

264 To compare the variance accounted for by all fixed and random effects, we examined the  
265 model's predicted values and their correlations with the observed values. We used the  
266 model to predict each social behaviour metric, and iteratively held each explanatory  
267 variable's predictions at the mean, one at a time. We then assessed the squared correlations  
268 of these values with the observed values (i.e.,  $R^2$ ), relative to those of the full model.  
269 Variables with greater effects in the model produced less accurate predicted values when  
270 held constant. Animal models generally extract the variance components (random effects) of  
271 genetic and non-genetic contributors to quantify heritability (Kruuk 2004). However, in INLA  
272 models, the SPDE variance components are hard to estimate where the range parameter is  
273 large; as such, predicting using the model is a preferred approach for our purposes (Finn  
274 Lindgren, pers. comms.). Nevertheless, the variance components were found to largely  
275 mirror our results when inspected.

276

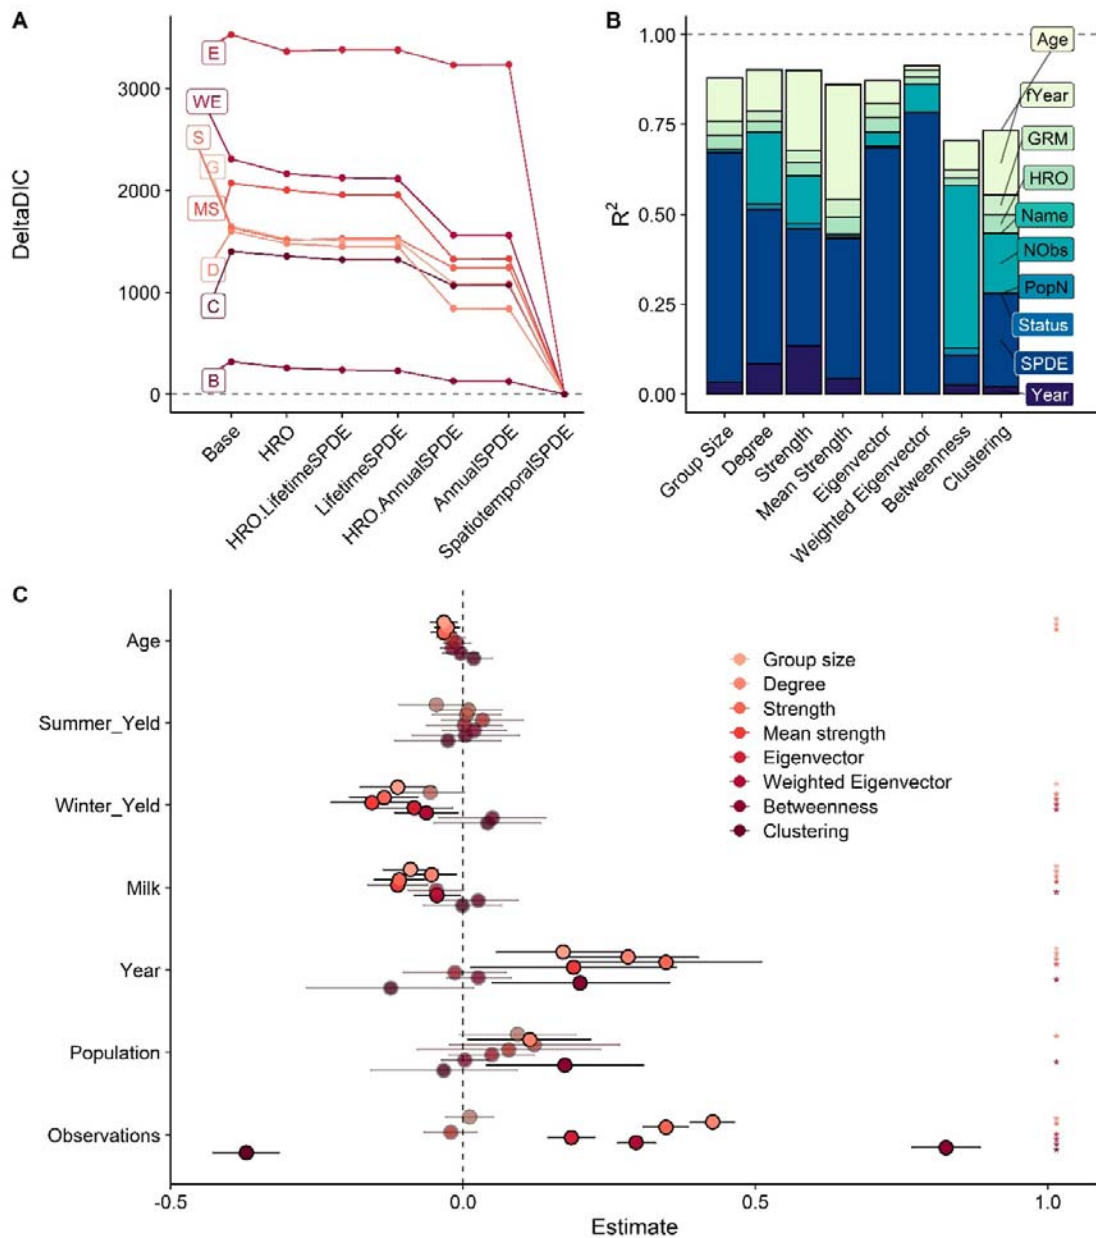

277

278 Figure 3: Model outputs demonstrating strong effects of spatial and non-spatial drivers on  
 279 social network positions. A: DIC changes associated with addition of different spatial  
 280 components, for all eight social network centrality measures. Models are arranged in order of  
 281 model fit, and the rank order varied little among response variables. Different colours  
 282 correspond to different network centrality response variables, with the same colour key as  
 283 panel C. The SPDE models are differentiated into those using individuals' lifetime centroids  
 284 ("LifetimeSPDE") and annual centroids ("AnnualSPDE") and the spatiotemporally varying  
 285 annual spatial fields ("SpatiotemporalSPDE"). B: Variance accounted for by each variable for  
 286 all eight network position measures, expressed as contribution to  $R^2$  in the annual model  
 287 (squared correlation between observed and predicted values). Different shades correspond  
 288 to different variables. fYear = year as a categorical random effect. GRM = Genomic

289 Relatedness Matrix. HRO = home range overlap. Name = individual identity. NObs = number  
290 of observations (i.e., sampling bias). PopN = population size. Status = reproductive status.  
291 SPDE = point location effects estimated using the Stochastic Partial Differentiation Equation  
292 effect in the INLA models. For all response variables, individual level effects (Age,  
293 Reproductive Status, Name) had a negligible effect. C: Fixed effect estimates for the models.  
294 Fixed effects are grouped into individual factors (age and three reproductive status effects),  
295 annual factors (continuous time in years since study began, and annual population size), and  
296 sampling factors (observation number). Reproductive status effects are separated into four  
297 levels: did not reproduce (the intercept); calf died in the first few months of life (“Summer  
298 Yeld”); calf died during the winter (“Winter Yeld”); and calf survived to May the following year  
299 (“Milk”). Different colours correspond to different network centrality response variables.  
300 Points represent the posterior mean; error bars denote the 95% credibility intervals for the  
301 effects. Asterisks denote significant variables (i.e., those whose estimates did not overlap  
302 with zero). Significant variables are fully opaque, while non-significant ones are transparent.  
303

## 304 Results

305 Spatial behaviours were extremely important in determining all eight individual-level social  
306 network position measures. The non-spatial model was by far the worst-fitting for all eight  
307 response variables, and the DIC changes associated with adding spatial components were  
308 substantial (Figure 3A). Notably, point location-based SPDE effects tended to improve model  
309 fit more than space sharing HRO effects, even when conceptualised at the same timescale  
310 (i.e., across the individual’s lifetime; Figure 1A). Investigating the  $R^2$  components of the  
311 models containing only HRO (i.e., without SPDE effects) revealed that in general spatial  
312 overlap accounted for more variation than the genetic matrix (Supplementary Figure 3), but  
313 comparing these with the other models revealed that the point location effects contributed  
314 more than either of these matrices (Figure 3B). Annually varying centroids further improved  
315 model fit, and allowing the spatial field to vary between years in our spatiotemporal models  
316 improved models even more (Figure 3A). Although the space sharing and genomic  
317 relatedness matrices had similar sized impacts on the full models (Figure 3B), removing the  
318 SPDE effect resulted in a substantial increase in the HRO effect, but with very little impact  
319 on the GRM’s  $R^2$  (Supplementary Figure 3). These findings were relatively consistent across  
320 all metrics (Figure 3A-B), although the SPDE effect was notably smaller for betweenness  
321 (Figure 3B). Taken together, these results reveal that lifetime space sharing was good at  
322 accounting for variation in social behaviour, but that its effect was surpassed by increasingly  
323 complex temporal formulations of point location effects.

324 We compared the importance of all fixed and random effects by predicting selectively from  
325 the model, revealing overwhelmingly strong effects of spatiotemporal factors (Figure 3B).  
326 Our models fit well and explained a substantial amount of variation in social network  
327 centrality (>70%), and the majority of the model’s fit was lent by the INLA SPDE effect  
328 (Figure 3B). Observations also had a notable impact for Degree, Betweenness, and

329 Clustering, and the categorical random effect for year had a substantial effect across all  
330 response variables (Figure 3B). Fixed effects for year and observation numbers were  
331 generally strong and significantly positive across metrics, except in the case of clustering,  
332 which was significantly negative (Figure 3B). There were also small positive effects of  
333 population size on betweenness and degree centrality (Figure 3B).

334 Although individual-level drivers (reproduction, age, and individual identity) had a negligible  
335 impact on all variables' R<sup>2</sup> (Figure 3B), many had a significant effect (i.e., their 95%  
336 credibility intervals did not overlap with zero; Figure 3C). Individuals whose calves lived to  
337 the winter and then either died before the 1<sup>st</sup> May ("Winter Yeld") or survived ("Milk") were  
338 generally less central than those that did not give birth ("True Yeld") or whose calf died  
339 before 1<sup>st</sup> October ("Summer Yeld"). Similarly, there were minor age-related decreases in  
340 network centrality for the direct metrics (Group Size, Degree, and Strength; Figure 3C).

341 To investigate spatial patterns of sociality, we projected the annual SPDE random effect in  
342 two-dimensional space (Figure 4; Supplementary Figures 5-12). As expected, the spatial  
343 distributions of network centrality metrics were highly variable, but generally peaked in the  
344 central north area of the study system and decreased outwards (Figure 4). Mean Strength  
345 was an exception, being lowest in the high-density areas and increasing outward (Figure  
346 4D); Clustering was patchily distributed, such that no clear pattern was evident (Figure 4H);  
347 and Betweenness was slightly offset, being highest in the north-northeast of the study area  
348 rather than in the central north (Figure 4G). The range of autocorrelation also varied among  
349 metrics; Betweenness and Clustering had notably shorter ranges than the other metrics  
350 (Supplementary Figure 4). We also plotted the spatial fields through time, revealing  
351 substantial variation in the spatial fields across the study period (Supplementary Figures 5-  
352 12).

353

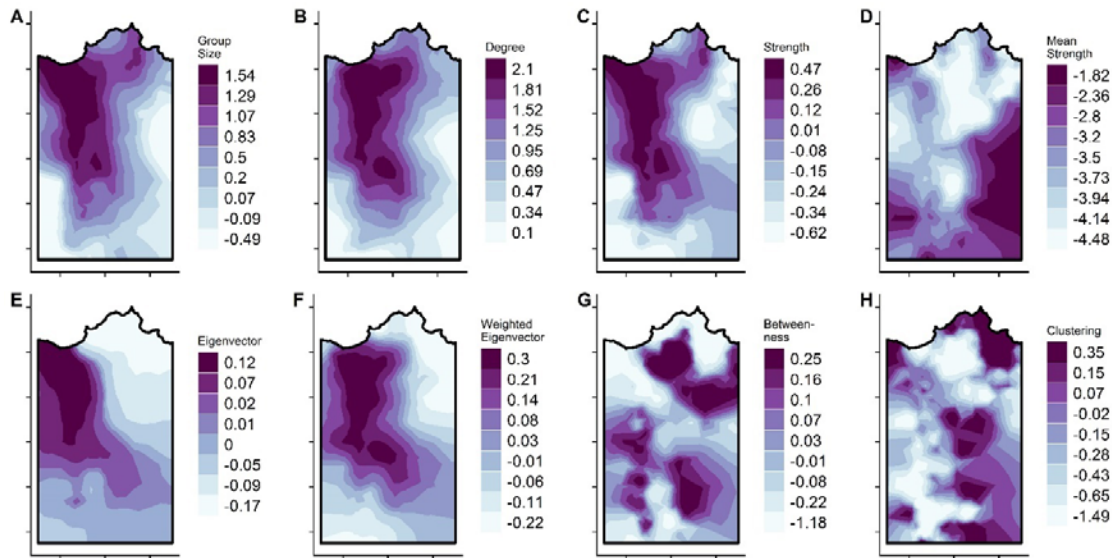

354

355 Figure 4 (Previous page): Spatial fields for the SPDE random effect for each response  
356 variable, taken from the INLA animal models and based on annual centroid point locations.

357 Metrics can be conceptualised as simpler dyadic “direct” metrics (top row) and more  
358 complex “indirect” metrics (bottom row). Darker colours correspond to greater values. Each  
359 axis tick corresponds to 1km; for the values associated with the Easting and Northings, see  
360 Figure 1.  
361

## 362 Discussion

### 363 The role of spatial behaviour in driving social network positions

364 The position individuals occupy within their social networks can affect many aspects of their  
365 ecology and evolution (Krause *et al.* 2015; Firth *et al.* 2018; Sah *et al.* 2018), and our results  
366 confirm the powerful role of fine-scale spatial activity in shaping such traits (e.g. Farine &  
367 Sheldon, 2019; Mourier *et al.*, 2019; Webber & Vander Wal, 2018). Although pairwise home  
368 range overlap was important in determining social centrality measures, point locations were  
369 substantially more important, and allowed us to more easily account for spatiotemporal  
370 variation. Inter-annual variation in spatial effects proved especially influential in our models,  
371 across increasingly sophisticated spatiotemporal model formulations. While point locations  
372 were superior to home range overlaps even at the same coarse timescale (i.e., across  
373 lifetimes), our models universally revealed benefits of incorporating temporally varying  
374 spatial behaviours. Moreover, the autocorrelation range and the importance of different  
375 behavioural components differed notably across centrality measures, suggesting that  
376 different spatial processes play a role in determining different network positions. As such, we  
377 propose that social network studies should more regularly incorporate both space sharing  
378 and (temporally varying) point locations in their statistical approaches to anticipate these



379 effects. This practice will help to buffer for the fact that the spatial environment not only  
380 correlates with social proximity, but can alter the fabric of the network itself.

### 381 **The landscape of sociality**

382 Spatial patterns were quite varied among metrics but were nevertheless amenable to  
383 interpretation. Most notably, the spatial distributions of direct metrics (group size, degree,  
384 and strength) were very similar and likely attributable to the concentration of resources in the  
385 form of high quality grazing, which peaks in the central north study area (Clutton-Brock *et al.*  
386 1982). Individuals' resource selection behaviours increase local density in this area (Clutton-  
387 Brock *et al.* 1982), and will increase social connectivity as a result (Ostfeld *et al.* 1986;  
388 Sanchez & Hudgens 2015; Webber & Vander Wal 2018). This comprises strong evidence for  
389 density-related increases in social contact frequency, and accentuates the vital importance  
390 of considering resource distribution, habitat selection, and population structure when  
391 examining social network correlates (Spiegel *et al.* 2016; Webber & Vander Wal 2018;  
392 Farine & Sheldon 2019; He *et al.* 2019). For these simpler, direct metrics, it is possible that a  
393 measure of local spatial population density (e.g. Coulson *et al.* 1997) could be fitted to  
394 control for and estimate spatial-social confounding. In contrast, betweenness peaked in the  
395 north-northeast of the system, likely because the northeastern community is slightly isolated  
396 from the rest of the population (Figure 2), so that many 'social paths' that traverse the  
397 population (the criteria for betweenness centrality) go through individuals in this intermediate  
398 area. The causes of the spatial distribution of clustering remain unresolved, but the pattern  
399 highlights areas where individuals are connected together in triads or tight cliques, and  
400 appears to be negatively correlated with betweenness (Figure 4). For these traits, it is  
401 unlikely that a simpler explanatory variable could be formulated to quantify the spatial-social  
402 processes at play.

403 Regardless of the causes of the spatial patterns, such fine-scale variation across the  
404 landscape holds important eco-evolutionary consequences, particularly for the more  
405 complex network metrics. For instance, the areas of high clustering may act as 'incubator'  
406 areas where cliques can develop new socially influenced behaviours (Firth 2020) such as  
407 cooperative behaviours (Rand *et al.* 2011). The high contact rates in the northern central  
408 areas might sustain high local burdens of directly transmitted diseases (Cote & Poulin 1995),  
409 while individuals inhabiting the high-betweenness intermediate areas may be important for  
410 transmitting novel diseases across the population as a whole (VanderWaal *et al.* 2014).  
411 Without using the SPDE effect (i.e., relying only on generalised pairwise space sharing  
412 rather than accounting for specific two-dimensional spatial patterns), these insights into  
413 these patterns would not have been possible.



#### 414 Analytical benefits of INLA animal models

415 Analyses using multiple layers of different behaviours are well-suited to extricating space  
416 and sociality in wild animal systems (Silk *et al.* 2018; Webber & Vander Wal 2018; Finn *et al.*  
417 2019), and there is increasing conceptual and analytical overlap between movement-based  
418 and network-based approaches (Jacoby & Freeman 2016; Mourier *et al.* 2019; Pasquaretta  
419 *et al.* 2020). Notably, many spatial-social studies suffer from the necessity to reduce  
420 complex movement patterns into simpler metrics, which risks losing important information in  
421 the process. As such, recent studies have pushed for researchers to incorporate movement  
422 trajectories themselves into complex network data structures (Mourier *et al.* 2019). Our  
423 approach allows incorporation of multiple dyadic and non-dyadic behavioural measures, and  
424 with several analytical timescales, offering an alternative workaround to this problem.  
425 Although other methods can control for point locations (e.g. using autoregressive processes  
426 and row/column effects; Stopher *et al.* 2012b), INLA models allow greater precision, fit  
427 quickly, and allow easy incorporation of spatiotemporal structuring. Furthermore, plotting the  
428 SPDE effect in two dimensions, as in Figure 4, gives an easily interpretable and intuitive  
429 portrayal of network traits in space that can be hard to visualise using other methods. For  
430 these reasons, we highly recommend further exploration of INLA animal models as a flexible  
431 method with which to extricate individual, demographic, spatial, and temporal contributors to  
432 sociality where sample sizes are sufficient (Thomson *et al.* 2018; Webber & Vander Wal  
433 2018). In addition to carrying out network-level manipulations (Daraganova *et al.* 2012; Davis  
434 *et al.* 2015; Firth & Sheldon 2016; Farine 2017), researchers concerned about spatial  
435 confounding could implement relatively familiar linear models of social behaviour, but with  
436 additional spatial components such as SPDE random effects and similarity matrix variance  
437 components, with trustworthy and interpretable results (Albery *et al.*, in review).

438 Our approach also allowed us to quantify the impacts of multiple non-spatial drivers of  
439 network centrality and compare them with spatial behaviour. Although space accounted for  
440 an overwhelming amount of variation, many other factors had substantial effects. The  
441 categorical random effect for interannual variation was substantial, and there were  
442 detectable linear annual effects and population size effects, as expected given the important  
443 roles of demography in structuring social networks (Shizuka & Johnson 2019). Individual-  
444 level factors had weaker contributions to model fit and smaller effect sizes: most notably,  
445 genetic and individual random effects were negligible when spatial autocorrelation was  
446 accounted for, confirming the importance of considering space when assessing heritability  
447 independently of space in this population (Stopher *et al.* 2012a). Notably, previous analyses  
448 in this system revealed that accounting for space substantially reduced heritability estimates  
449 for spatial behaviour (home range size), but less so for life history characteristics (Stopher *et*

450 *al.* 2012a). We impress that the finding of extreme spatial dependence in social behaviour  
451 does not necessarily imply that other traits will be subject to a similar reduction in heritability,  
452 although incorporating point locations may be similarly revealing about the non-spatial  
453 drivers of such traits.

454 Nevertheless, individual-level effects were encouragingly still detectable and significant,  
455 particularly for simpler “direct” metrics. It is possible that more complex social network  
456 positions are less determined by individual social behaviours, particularly for animals with  
457 relatively strong fission-fusion dynamics (i.e., heavy mixing) such as the deer; this  
458 hypothesis could be tested using similar spatial-social analyses in a number of other  
459 systems. This finding demonstrates that even when spatial structuring plays a vital role in  
460 determining social network structure, controlling for this structuring analytically can reveal  
461 important, conservative individual-level effects. Future analyses within this population, and  
462 potentially other long-term studies, could take advantage of this framework by including  
463 environmental drivers such as food availability and climatic factors to explain patterns of  
464 social connectivity, while further unpicking the causes of the individual-level trends that we  
465 observed.

## 466 Acknowledgements

467 We thank Scottish Natural Heritage and its predecessors for permission to work on the Isle  
468 of Rum NNR. The field project has been supported by grants mainly from the UK NERC with  
469 some additional funding from BBSRC, the Royal Society and ERC. We thank all who have  
470 contributed to the maintenance of the project over time, especially Loeske Kruuk. We thank  
471 multiple dedicated field workers who have contributed to field data collection, especially  
472 Fiona Guinness who collected the first 20 years of census data. JAF was supported by a  
473 fellowship from Merton College and BBSRC (BB/S009752/1) and funding from NERC  
474 (NE/S010335/1). We thank Amy Sweeny and Quinn Webber for comments on the  
475 manuscript.

## 476 References

- 477 Albery, G.F., Becker, D.J., Kenyon, F., Nussey, D.H. & Pemberton, J.M. (2019). The fine-  
478 scale landscape of immunity and parasitism in a wild ungulate population. *Integr.*  
479 *Comp. Biol.*, icz016, 1–11.
- 480 Albery, G.F., Watt, K.A., Keith, R., Morris, S., Morris, A., Kenyon, F., *et al.* (2020).  
481 Reproduction has different costs for immunity and parasitism in a wild mammal. *Funct.*  
482 *Ecol.*, 34.

- 483 Becker, D.J., Streicker, D.G. & Altizer, S. (2015). Linking anthropogenic resources to wildlife-  
484 pathogen dynamics: a review and meta-analysis. *Ecol. Lett.*, n/a-n/a.
- 485 Cairns, S.J. & Schwager, S.J. (1987). A comparison of association indices. *Anim. Behav.*,  
486 35, 1454–1469.
- 487 Castles, M., Heinsohn, R., Marshall, H.H., Lee, A.E.G., Cowlshaw, G. & Carter, A.J. (2014).  
488 Social networks created with different techniques are not comparable. *Anim. Behav.*,  
489 96, 59–67.
- 490 Clutton-Brock, T.H., Albon, S.D. & Guinness, F.E. (1989). Fitness costs of gestation and  
491 lactation in wild mammals. *Nature*, 337, 260–262.
- 492 Clutton-Brock, T.H., Guinness, F.E. & Albon, S.D. (1982). *Red Deer: Behavior and Ecology*  
493 *of Two Sexes*. University of Chicago Press, Chicago, IL.
- 494 Cote, I.M. & Poulin, R. (1995). Parasitism and group size in social animals: A meta-analysis.  
495 *Behav. Ecol.*, 6, 159–165.
- 496 Coulson, T., Albon, S., Guinness, F., Pemberton, J. & Clutton-Brock, T. (1997). Population  
497 Substructure, Local Density, and Calf Winter Survival in Red Deer (*Cervus elaphus*).  
498 *Ecology*, 78, 852.
- 499 Croft, D.P., James, R. & Krause, J. (2008). *Exploring animal social networks*. Princeton  
500 University Press.
- 501 Daraganova, G., Pattison, P., Koskinen, J., Mitchell, B., Bill, A., Watts, M., *et al.* (2012).  
502 Networks and geography: Modelling community network structures as the outcome of  
503 both spatial and network processes. *Soc. Networks*, 34, 6–17.
- 504 Davis, S., Abbasi, B., Shah, S., Telfer, S. & Begon, M. (2015). Spatial analyses of wildlife  
505 contact networks. *J. R. Soc. Interface*, 12.
- 506 Farine, D.R. (2017). A guide to null models for animal social network analysis. *Methods Ecol.*  
507 *Evol.*, 8, 1309–1320.
- 508 Farine, D.R. & Sheldon, B.C. (2019). Stable multi-level social structure is maintained by  
509 habitat geometry in a wild bird population. *bioRxiv*, 1–30.
- 510 Finn, K.R., Silk, M.J., Porter, M.A. & Pinter-Wollman, N. (2019). The use of multilayer  
511 network analysis across social scales in animal behaviour. *Anim. Behav.*, 149, 7–22.
- 512 Firth, J.A. (2020). Considering complexity: animal social networks and behavioural  
513 contagions. *Trends Ecol. Evol.*, 35, 100–104.

- 514 Firth, J.A., Cole, E.F., Ioannou, C.C., Quinn, J.L., Aplin, L.M., Culina, A., *et al.* (2018).  
515 Personality shapes pair bonding in a wild bird social system. *Nat. Ecol. Evol.*, 2, 1696–  
516 1699.
- 517 Firth, J.A. & Sheldon, B.C. (2016). Social carry-over effects underpin trans-seasonally linked  
518 structure in a wild bird population. *Ecol. Lett.*, 19, 1324–1332.
- 519 Firth, J.A., Voelkl, B., Crates, R.A., Aplin, L.M., Biro, D., Croft, D.P., *et al.* (2017). Wild birds  
520 respond to flockmate loss by increasing their social network associations to others.  
521 *Proc. R. Soc. B Biol. Sci.*, 284.
- 522 Franks, D.W., Ruxton, G.D. & James, R. (2010). Sampling animal association networks with  
523 the gambit of the group. *Behav. Ecol. Sociobiol.*, 64, 493–503.
- 524 Froy, H., Börger, L., Regan, C.E., Morris, A., Morris, S., Pilkington, J.G., *et al.* (2018).  
525 Declining home range area predicts reduced late-life survival in two wild ungulate  
526 populations. *Ecol. Lett.*, 21, 1001–1009.
- 527 Froy, H., Walling, C.A., Pemberton, J.M., Clutton-brock, T.H. & Kruuk, L.E.B. (2016).  
528 Relative costs of offspring sex and offspring survival in a polygynous mammal. *Biol.*  
529 *Lett.*, 12, 20160417.
- 530 He, P., Maldonado-chaparro, A.A. & Farine, D.R. (2019). The role of habitat configuration in  
531 shaping social structure: a gap in studies of animal social complexity. *Behav. Ecol.*  
532 *Sociobiol.*, 73.
- 533 Holand, A.M., Steinsland, I., Martino, S. & Jensen, H. (2013). Animal Models and Integrated  
534 Nested Laplace Approximations. *Genes/Genomes/Genetics*, 3, 1241–1251.
- 535 Huisman, J., Kruuk, L.E.B., Ellis, P.A., Clutton-Brock, T.H. & Pemberton, J.M. (2016).  
536 Inbreeding depression across the lifespan in a wild mammal population. *Proc. Natl.*  
537 *Acad. Sci.*, 113, 201518046.
- 538 Jacoby, D.M.P. & Freeman, R. (2016). Emerging Network-Based Tools in Movement  
539 Ecology. *Trends Ecol. Evol.*, 31, 301–314.
- 540 Krause, J., James, R., Franks, D.W. & Croft, D.P. (2015). *Animal social networks*. Oxford  
541 University Press, Oxford, UK.
- 542 Kruuk, L.E.B. (2004). Estimating genetic parameters in natural populations using the “animal  
543 model.” *Philos. Trans. R. Soc. B Biol. Sci.*, 359, 873–890.
- 544 Lindgren, F. & Rue, H. (2015). Bayesian Spatial Modelling with R-INLA. *J. Stat. Softw.*, 63,  
545 1–25.

- 546 Lindgren, F., Rue, H. & Lindstrom, J. (2011). An explicit link between Gaussian fields and  
547 Gaussian Markov random fields: the stochastic partial differential equation approach. *J.*  
548 *R. Stat. Soc. B*, 73, 423–498.
- 549 Lusseau, D., Wilson, B., Hammond, P.S., Grellier, K., Durban, J.W., Parsons, K.M., *et al.*  
550 (2006). Quantifying the influence of sociality on population structure in bottlenose  
551 dolphins. *J. Anim. Ecol.*, 75, 14–24.
- 552 Mourier, J., Lédée, E.J.I. & Jacoby, D.M.P. (2019). A multilayer perspective for inferring  
553 spatial and social functioning in animal movement networks. *bioRxiv*.
- 554 Ostfeld, R.S., Lidicker, W.Z., Heske, E.J., Ostfeld, R.S., Lidicker, W.Z. & Heske, E.J. (1986).  
555 The Relationship between Habitat Heterogeneity, Space Use, and Demography in a  
556 Population of California Voles. *J. Mammal.*, 45, 433–442.
- 557 Pasquaretta, C., Dubois, T., Gomez-Moracho, T., Perilhon Delepouille, V., Le Loc'h, G.,  
558 Heeb, P., *et al.* (2020). Analysis of temporal patterns in animal movement networks.  
559 *Methods Ecol. Evol.*, 0–1.
- 560 Rand, D.G., Arbesman, S. & Christakis, N.A. (2011). Dynamic social networks promote  
561 cooperation in experiments with humans. *Proc. Natl. Acad. Sci. U. S. A.*, 108, 19193–  
562 19198.
- 563 Regan, C.E., Pilkington, J.G., Berenos, C., Pemberton, J.M., Smiseth, P.T. & Wilson, A.J.  
564 (2016). Accounting for female space sharing in St. Kilda Soay sheep (*Ovis aries*)  
565 results in little change in heritability estimates. *J. Evol. Biol.*, 30, 96–111.
- 566 Robert, K., Garant, D. & Pelletier, F. (2012). Keep in touch: Does spatial overlap correlate  
567 with contact rate frequency? *J. Wildl. Manage.*, 76, 1670–1675.
- 568 Sah, P., Mann, J. & Bansal, S. (2018). Disease implications of animal social network  
569 structure: A synthesis across social systems. *J. Anim. Ecol.*, 87, 546–558.
- 570 Sanchez, J.N. & Hudgens, B.R. (2015). Interactions between density, home range  
571 behaviors, and contact rates in the Channel Island fox (*Urocyon littoralis*). *Ecol. Evol.*,  
572 5, 2466–2477.
- 573 Shizuka, D. & Johnson, A.E. (2019). How demographic processes shape animal social  
574 networks. *Behav. Ecol.*, 1–11.
- 575 Silk, M.J., Finn, K.R., Porter, M.A. & Pinter-Wollman, N. (2018). Can Multilayer Networks  
576 Advance Animal Behavior Research? *Trends Ecol. Evol.*, 33, 376–378.
- 577 Silk, M.J., Hodgson, D., Rozins, C., Croft, D., Delahay, R., Boots, M., *et al.* (2019).

- 578 Integrating social behaviour, demography and disease dynamics in network models:  
579 applications to disease management in declining wildlife populations. *Philos. Trans. R.*  
580 *Soc. B*, 374, 20180211.
- 581 Sosa, S., Sueur, C. & Puga-Gonzalez, I. (2020). Network measures in animal social network  
582 analysis: their strengths, limits, interpretations and uses. *Methods Ecol. Evol.*
- 583 Spiegel, O., Leu, S.T., Sih, A. & Bull, C.M. (2016). Socially interacting or indifferent  
584 neighbours? Randomization of movement paths to tease apart social preference and  
585 spatial constraints, 971–979.
- 586 Stopher, K. V., Nussey, D.H., Guinness, F., Morris, A., Pemberton, J.M., Clutton-Brock, T.H.,  
587 *et al.* (2012a). Re-mating across years and intralocus polygyny are associated with  
588 greater than expected levels of inbreeding in wild red deer. *J. Evol. Biol.*, 25, 2457–  
589 2469.
- 590 Stopher, K. V., Walling, C. a, Morris, A., Guinness, F.E., Clutton-brock, T.H., Pemberton,  
591 J.M., *et al.* (2012b). Shared spatial effects on quantitative genetic parameters:  
592 accounting for spatial autocorrelation and home range overlap reduces estimates of  
593 heritability in wild red deer. *Evolution*, 66, 2411–26.
- 594 Thomson, C.E., Winney, I.S., Salles, O.C. & Pujol, B. (2018). A guide to using a Multiple-  
595 Matrix animal model to disentangle genetic and nongenetic causes of phenotypic  
596 variance. *PLoS One*, 13, e0197720.
- 597 VanderWaal, K.L., Atwill, E.R., Isbell, L.A. & McCowan, B. (2014). Linking social and  
598 pathogen transmission networks using microbial genetics in giraffe (*Giraffa*  
599 *camelopardalis*). *J. Anim. Ecol.*, 83, 406–414.
- 600 Vander Wal, E., Laforge, M.P. & McLoughlin, P.D. (2014). Density dependence in social  
601 behaviour: Home range overlap and density interacts to affect conspecific encounter  
602 rates in a gregarious ungulate. *Behav. Ecol. Sociobiol.*, 68, 383–390.
- 603 Webber, Q.M.R. & Vander Wal, E. (2018). An evolutionary framework outlining the  
604 integration of individual social and spatial ecology. *J. Anim. Ecol.*, 87, 113–127.
- 605 Webber, Q.M.R. & Vander Wal, E. (2019). Trends and perspectives on the use of animal  
606 social network analysis in behavioural ecology: a bibliometric approach. *Anim. Behav.*,  
607 149, 77–87.
- 608 Yang, J., Lee, S.H., Goddard, M.E. & Visscher, P.M. (2011). GCTA: A Tool for Genome-wide  
609 Complex Trait Analysis. *Am. J. Hum. Genet.*, 88, 76.



610 Zuur, A.F., Ieno, E.N. & Saveliev, A.A. (2017). *Beginner's guide to spatial, temporal, and*  
611 *spatial-temporal ecological data analysis with R-INLA*. Highstat Ltd.

612
